# Supplementary material for: Enhanced photoluminescence of hollow CaWO4 microspheres: the fast fabrication, structural manipulation, and exploration of the growth mechanism
Source: Royal Society of Chemistry journal article supplement (doi:10.1039/d1qm01639c), 2022-01-01
Supplement: d1qm01639c1.pdf [file d1qm01639c1.pdf]

## Electronic Supplementary Information

### The enhanced photoluminescence of hollow CaWO<sub>4</sub> microspheres: the fast fabrication, structural manipulation, and the exploration of growth mechanism

Jiahao Zhu,<sup>a</sup> Chunsheng Li,<sup>\*a,c</sup> Yan Sun,<sup>\*a</sup> Chen Yang,<sup>a</sup> Yijing Zhao,<sup>a</sup> Zhu Zhu,<sup>a</sup> Lin Li,<sup>b</sup> Zhe Hu,<sup>b</sup> Shulei Chou,<sup>\*b</sup> Didi Wang,<sup>a</sup> Yuzhen Zhao,<sup>\*c</sup> Pengchao Liu,<sup>a</sup> Miaomiao Wang,<sup>a</sup> Yuanliang Li<sup>d</sup>

- a. School of Chemistry and Life Sciences, Suzhou University of Science and Technology, Suzhou City, Jiangsu Province 215009 (P. R. China)  
E-mail: lichsheng@163.com
- b. Institute for Carbon Neutralization, College of Chemistry and Materials Engineering, Wenzhou University, Wenzhou, Zhejiang Province 325035 (P. R. China)  
E-mail: chou@wzu.edu.cn
- c. Xi'an Key Laboratory of Advanced Photo-electronics Materials and Energy Conversion Device, School of Science, Xijing University, Xi'an, Shaanxi Province 710123 (P. R. China)  
E-mail: zyz19870226@163.com
- d. Hebei Provincial Key Laboratory of Inorganic Nonmetallic Materials, Key Laboratory of Environment Functional Materials of Tangshan City, College of Materials Science and Engineering, North China University of Science and Technology, Tangshan City, Hebei Province 063210 (P. R. China)

† C. Yang and J. H. Zhu contributed equally to this work.

## 1. The parallel experimental parameters and corresponding morphologies of the as-produced $\text{CaWO}_4$

**Table S1** Generalization of the experimental data and their structural information of the as-obtained tetragonal  $\text{CaWO}_4$

| Sample | $c(\text{Ca}(\text{NO}_3)_2)$<br>(mol L <sup>-1</sup> ) | $c(\text{Na}_2\text{WO}_4)$<br>(mol L <sup>-1</sup> ) | $c(\text{SDBS})$<br>(mol L <sup>-1</sup> ) | Time<br>(min) | Morphology                                                                                                           |
|--------|---------------------------------------------------------|-------------------------------------------------------|--------------------------------------------|---------------|----------------------------------------------------------------------------------------------------------------------|
| 1      | 0.200                                                   | 0.200                                                 | 0.020                                      | 30            | Hollow microspheres (diameter: 2.60-5.78 $\mu\text{m}$ ) assembled by nanospheres (size: 20.94-64.12 nm)             |
| 2      | 0.025                                                   | 0.025                                                 | 0.020                                      | 30            | Cauliflower-like microstructure (diameter: 3.49-5.33 $\mu\text{m}$ ) made of nanosheets (thickness: 89.96-269.87 nm) |
| 3      | 0.050                                                   | 0.050                                                 | 0.020                                      | 30            | Microspheres (diameter: 4.15-5.41 $\mu\text{m}$ ) built up ordered nanoparticles (size: 31.84-131.01 nm)             |
| 4      | 0.100                                                   | 0.100                                                 | 0.020                                      | 30            | Porous microspheres (diameter: 4.18-5.90 $\mu\text{m}$ ) aggregated via small nanoparticles (size: 23.37-78.63 nm)   |
| 5      | 0.400                                                   | 0.400                                                 | 0.020                                      | 30            | Monodisperse microspheres (diameter: 1.87-3.41 $\mu\text{m}$ ) composed by nanoparticles (size: 18.03-66.68 nm)      |
| 6      | 0.200                                                   | 0.200                                                 | 0.020                                      | 1             | Solid microspheres (diameter: 1.35-3.37 $\mu\text{m}$ ) constituted of nanoparticles (size: 14.44-64.91 nm)          |
| 7      | 0.200                                                   | 0.200                                                 | 0.020                                      | 2             | Solid microspheres (diameter: 1.96-3.31 $\mu\text{m}$ ) consisted of nanoparticles (size: 13.68-54.08 nm)            |
| 8      | 0.200                                                   | 0.200                                                 | 0.020                                      | 5             | Hollow microspheres (diameter: 2.79-5.06 $\mu\text{m}$ ) formed by nanoparticles (size: 16.14-58.56 nm)              |
| 9      | 0.200                                                   | 0.200                                                 | 0.020                                      | 15            | Hollow microspheres (diameter: 2.12-4.01 $\mu\text{m}$ ) built up nanoparticles (size: 17.97-53.94 nm)               |

## 2. The detailed structural information and corresponding XRD results of the as-prepared $\text{CaWO}_4$ samples

(1) Statistics of particle size for hollow  $\text{CaWO}_4$  microspheres from the FE-SEM image of Fig. 1.

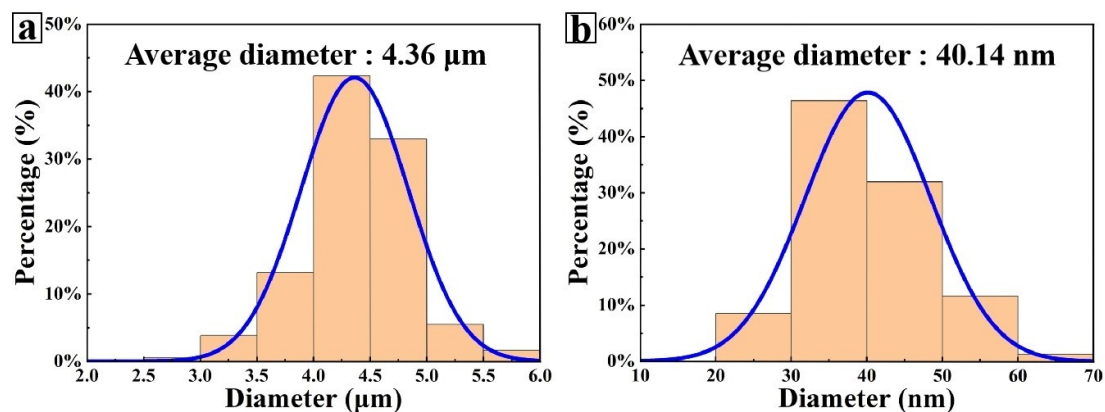

**Fig. S1** Statistics results of particle size distribution for hollow  $\text{CaWO}_4$  microspheres (Sample 1) and nanospheres size distribution on the outer surfaces of selected microspheres: (a) data from **Fig. 1b** in the text: histogram and fitted normal curves of hollow  $\text{CaWO}_4$  microspheres at a low magnification, and (b) data from **Fig. 1e**: histogram and fitted normal curves of particle size of nanospheres from single hollow  $\text{CaWO}_4$  microspheres surface at a relatively high magnification.

(2) Statistics of particle size of  $\text{CaWO}_4$  synthesized at different conditions from the FE-SEM image of Fig. 2 and Fig. 3.

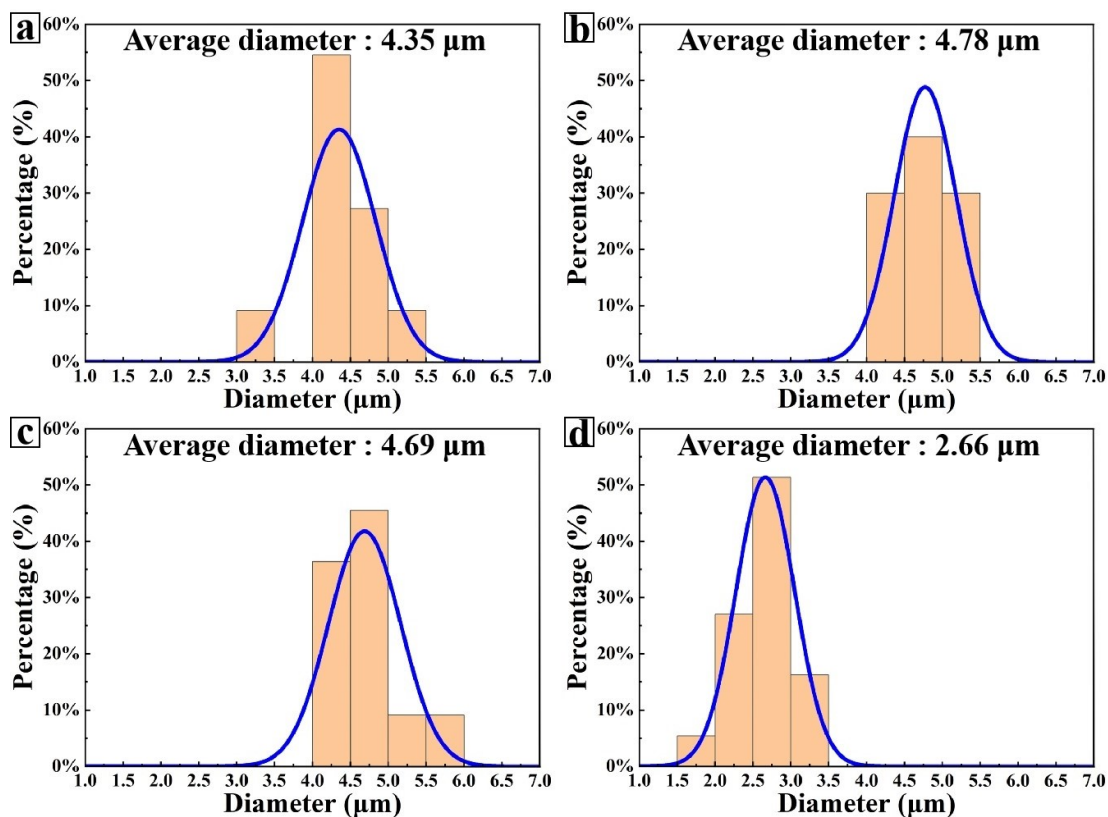

**Fig. S2** Histogram and fitted normal curves of size distribution of  $\text{CaWO}_4$  microspheres (Sample 2-5) synthesized at different concentrations of raw materials but with a constant concentration ratio ( $\text{Na}_2\text{WO}_4$ :  $\text{Ca}(\text{NO}_3)_2 = 1 : 1$ ): (a) data from **Fig. 2a**:  $0.025 \text{ mol L}^{-1}$  (Sample 2), (b) data from **Fig. 2d**:  $0.050 \text{ mol L}^{-1}$  (Sample 3), (c) data from **Fig. 2g**:  $0.100 \text{ mol L}^{-1}$  (Sample 4), and (d) data from **Fig. 2j**:  $0.400 \text{ mol L}^{-1}$  (Sample 5).

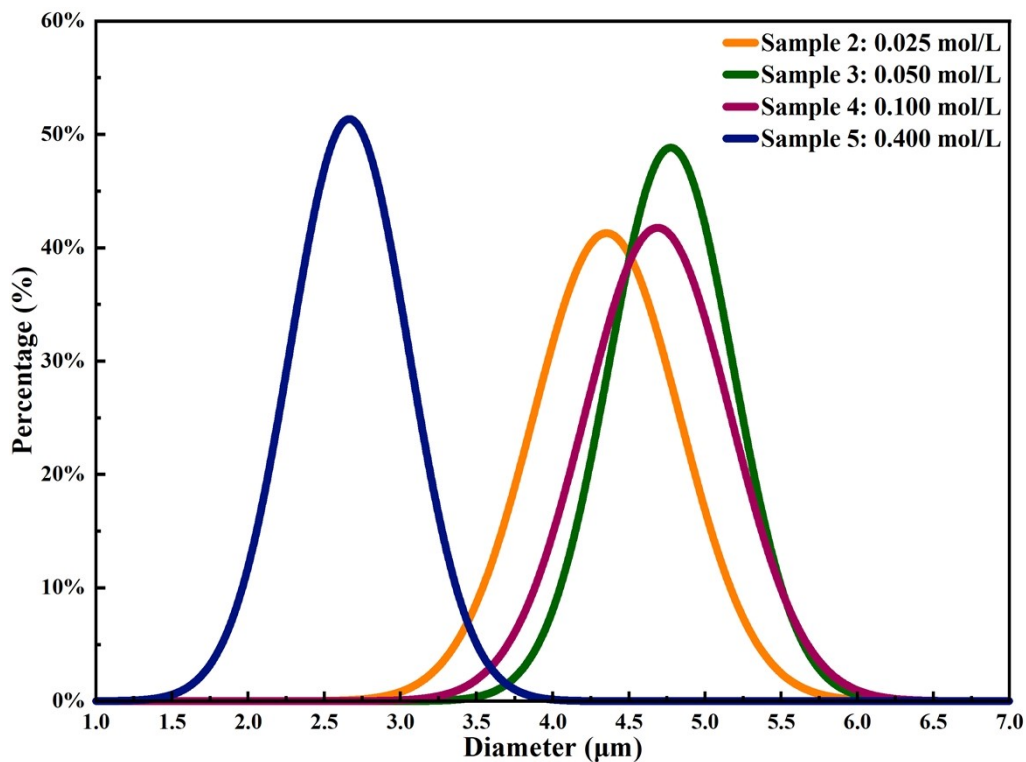

**Fig. S3** Data from **Fig. 2a, d, g, and j**: merged the fitted normal curves of size distribution of hollow  $\text{CaWO}_4$  microspheres (Sample 2-5) synthesized at different concentrations of raw materials but with the same concentration ratio ( $\text{Na}_2\text{WO}_4$ :  $\text{Ca}(\text{NO}_3)_2 = 1 : 1$ ).

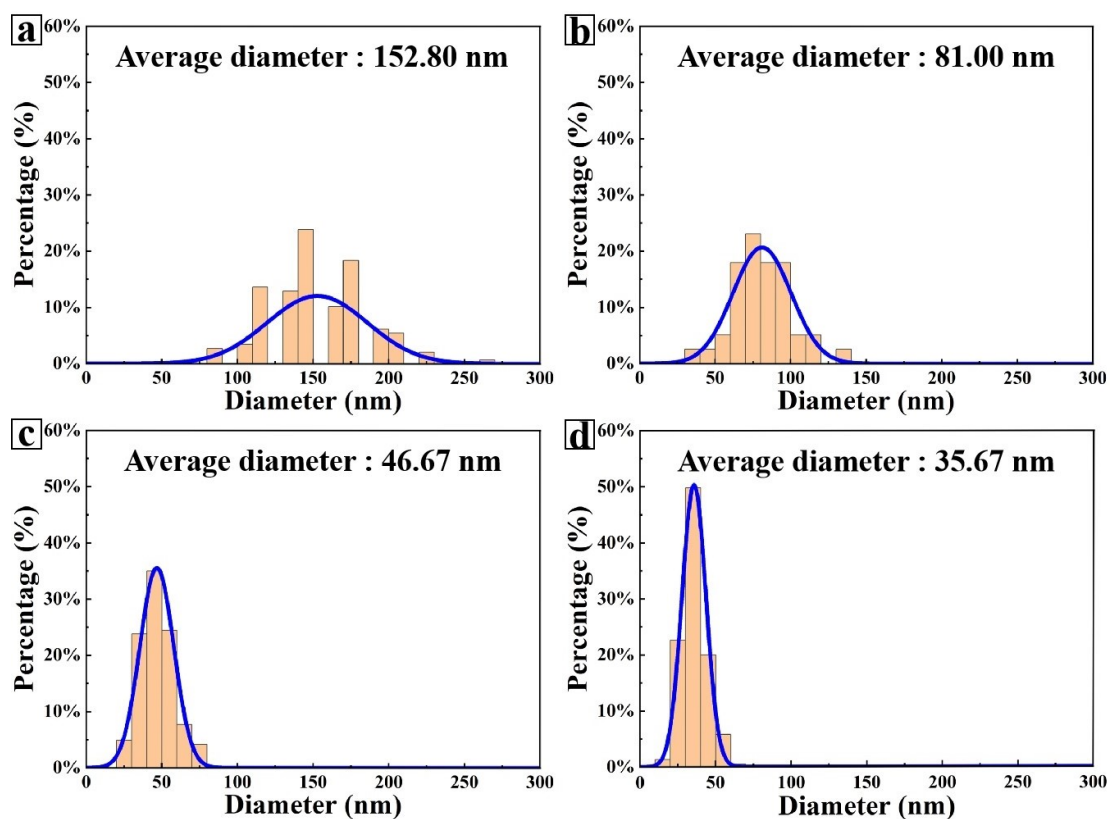

**Fig. S4** Histogram and fitted normal curves of nanoparticles size distribution on the outer surfaces of  $\text{CaWO}_4$  microspheres (Sample 2-5) synthesized at different concentrations of raw materials but with the same concentration ratio ( $\text{Na}_2\text{WO}_4$ :  $\text{Ca}(\text{NO}_3)_2 = 1 : 1$ ) : (a) data from **Fig. 2c**:  $0.025 \text{ mol L}^{-1}$  (Sample 2), (b) data from **Fig. 2f**:  $0.050 \text{ mol L}^{-1}$  (Sample 3), (c) data from **Fig. 2i**:  $0.100 \text{ mol L}^{-1}$  (Sample 4), and (d) data from **Fig. 2l**:  $0.400 \text{ mol L}^{-1}$  (Sample 5).

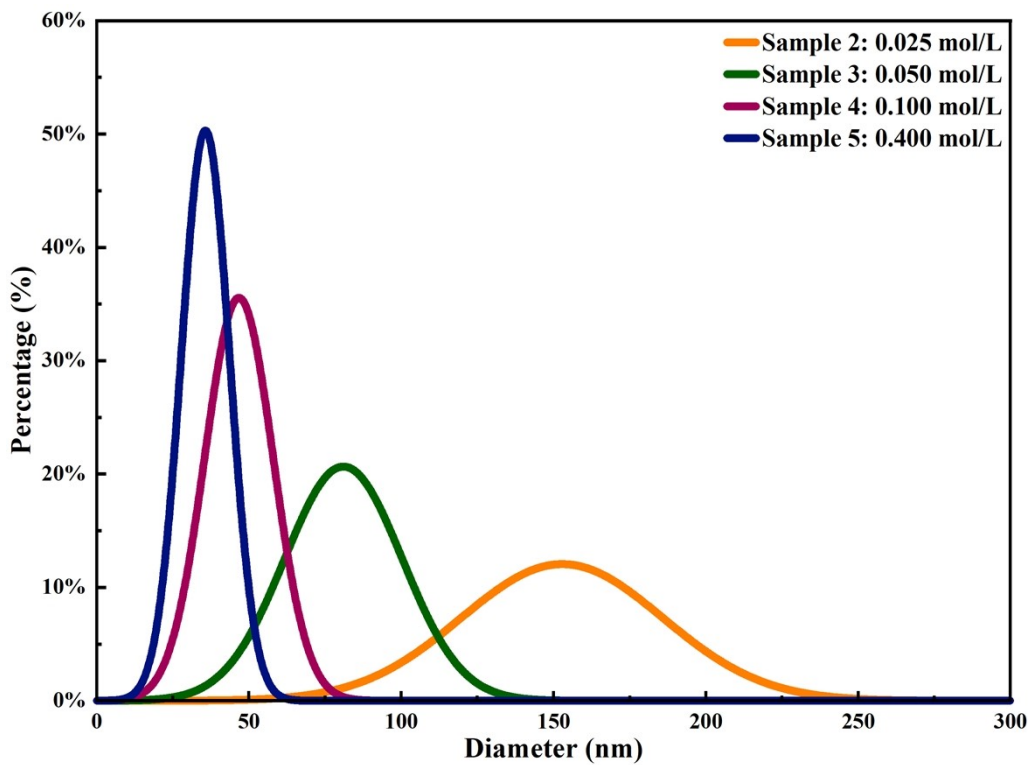

**Fig. S5** Data from **Fig. 2c, f, i, and l**: merged the fitted normal curves of nanoparticles size distribution on the outer surfaces of  $\text{CaWO}_4$  microspheres, synthesized at different concentrations of raw materials but with the same concentration ratio ( $\text{Na}_2\text{WO}_4$ :  $\text{Ca}(\text{NO}_3)_2 = 1 : 1$ ) for Sample 2-5.

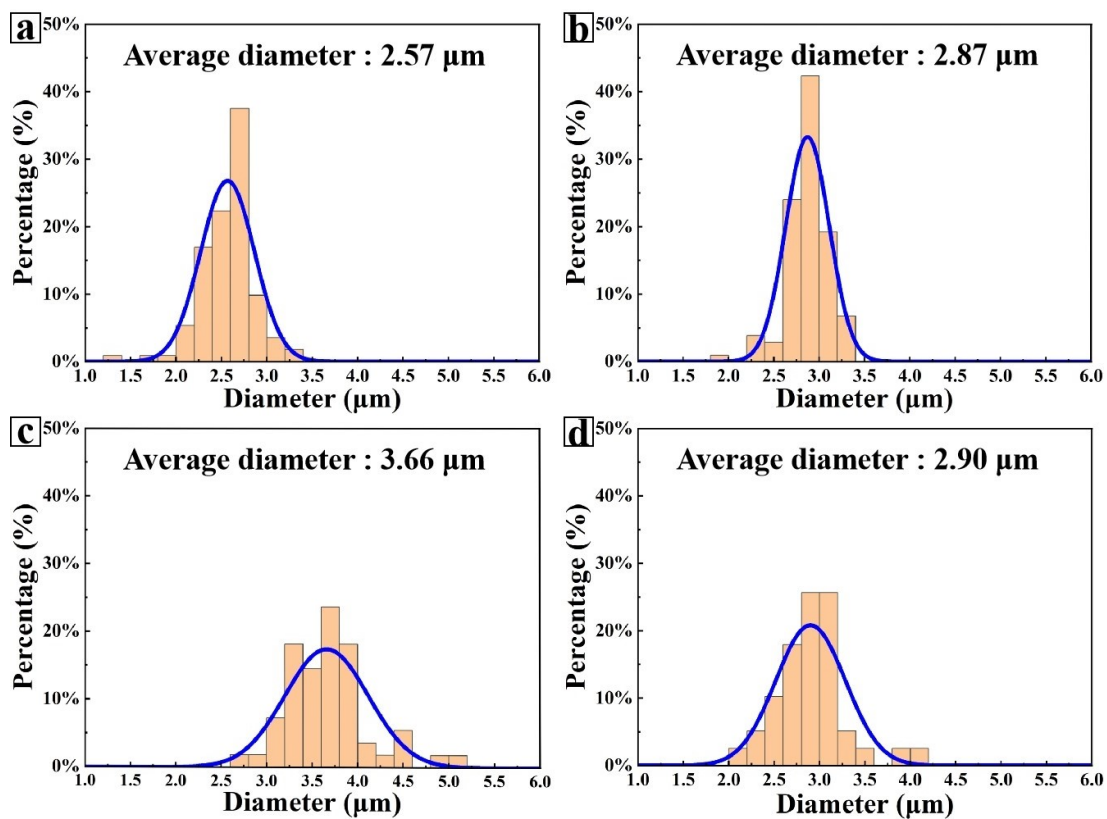

**Fig. S6** Histogram and fitted normal curves of particle size distribution for porous-shell hollow  $\text{CaWO}_4$  microspheres (Sample 6-9), fabricated by the microwave irradiation process at continuous reaction intervals: (a) data from **Fig. 3a**: 1 min (Sample 6), (b) data from **Fig. 3e**: 2 min (Sample 7), (c) data from **Fig. 3i**: 5 min (Sample 8), and (d) data from **Fig. 3m**: 15 min (Sample 9).



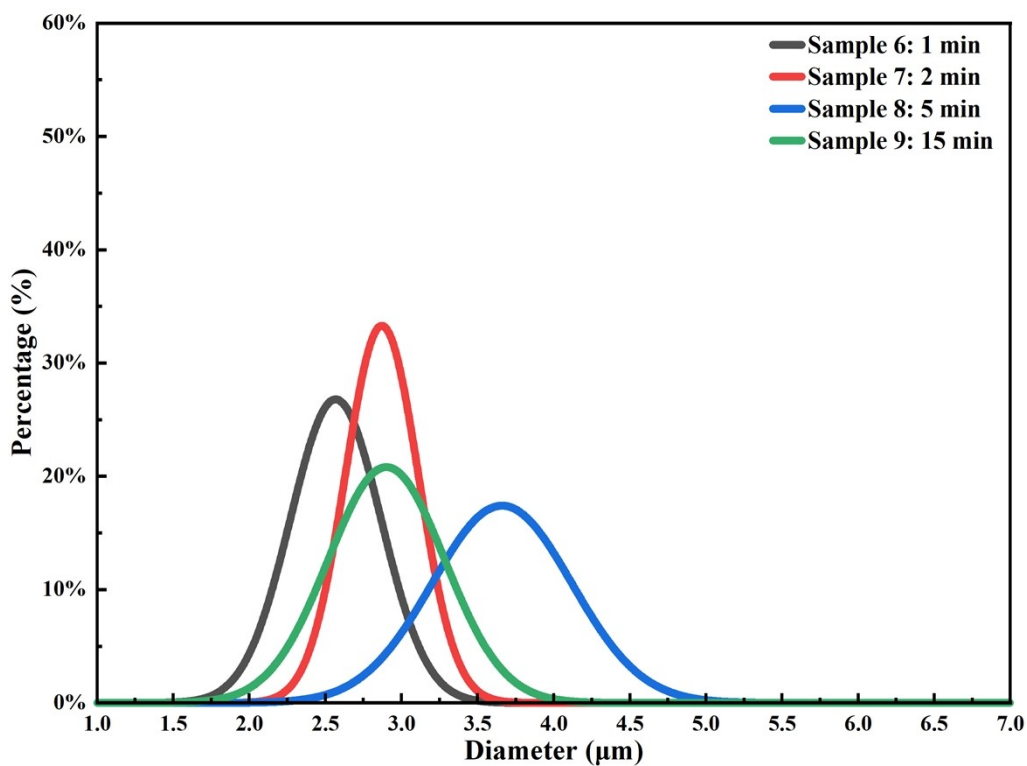

**Fig. S7** Data from **Fig. 3a, e, i, and m**: merged the fitted normal curves of particle size distribution for porous-shell hollow  $\text{CaWO}_4$  microspheres, prepared by the microwave irradiation process at continuous reaction timespans (Sample 6-9).

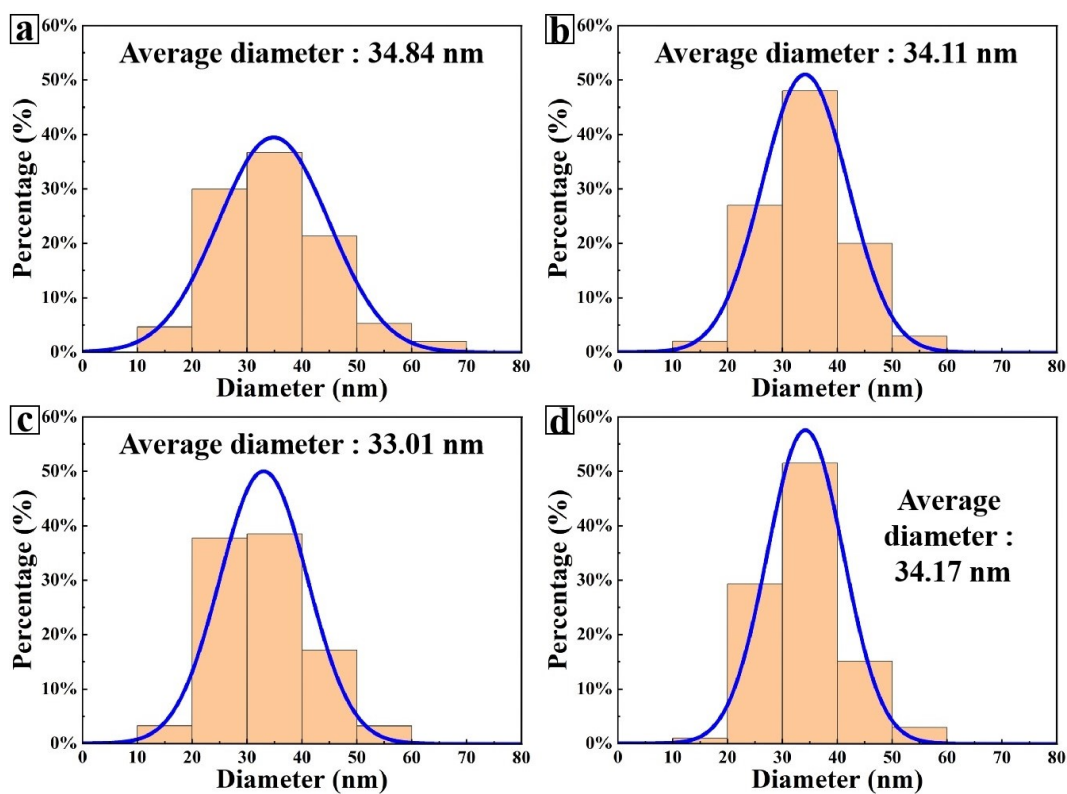

**Fig. S8** Histogram and fitted normal curves of nanoparticles size distribution on the outer surfaces for porous-shell hollow  $\text{CaWO}_4$  microspheres (Sample 6-9), obtained by the microwave irradiation process at continuous reaction intervals: (a) data from **Fig. 3d**: 1 min (Sample 6), (b) data from **Fig. 3h**: 2 min (Sample 7), (c) data from **Fig. 3l**: 5 min (Sample 8), and (d) data from **Fig. 3p**: 15 min (Sample 9).

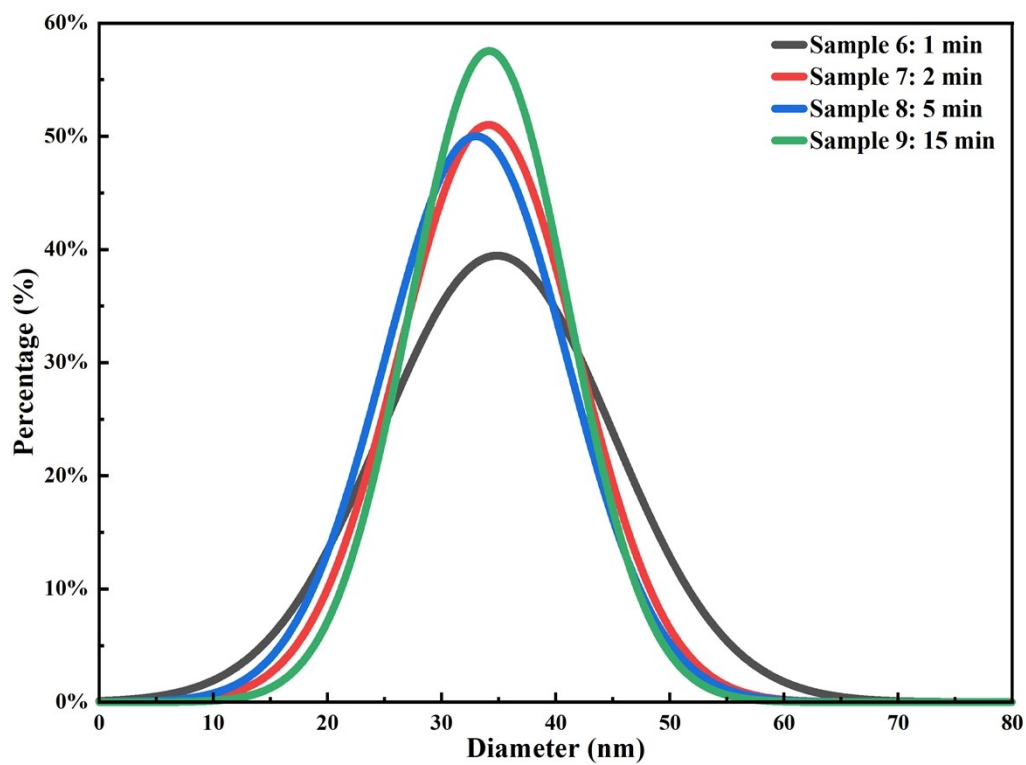

**Fig. S9** Data from **Fig. 3d, h, l, and p**: merged the fitted normal curves of nanoparticles size distribution on the outer surfaces of porous-shell hollow  $\text{CaWO}_4$  microspheres (Sample 6-9).

(3) XRD patterns of porous-shell hollow  $\text{CaWO}_4$  microspherical structures synthesized at different concentrations of raw materials.

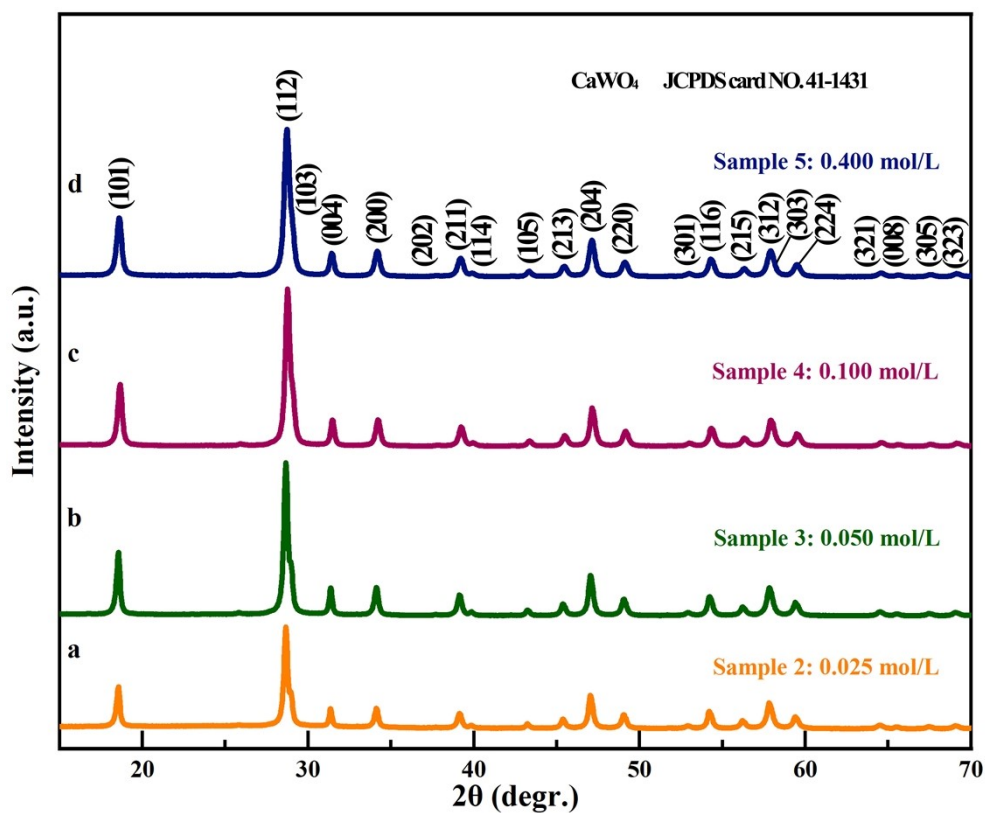

**Fig. S10** XRD patterns of  $\text{CaWO}_4$  microspherical structures (Sample 2-5) fabricated through a facile microwave irradiation route with the same dwell time (30 min) under different concentrations of raw materials but with the same concentration ratio ( $\text{Na}_2\text{WO}_4$ :  $\text{Ca}(\text{NO}_3)_2 = 1 : 1$ ): (a)  $0.025 \text{ mol L}^{-1}$  (Sample 2), (b)  $0.050 \text{ mol L}^{-1}$  (Sample 3), (c)  $0.100 \text{ mol L}^{-1}$  (Sample 4), and (d)  $0.400 \text{ mol L}^{-1}$  (Sample 5).

(4) TEM/HRTEM images of selected nanospheres on porous-shell hollow  $\text{CaWO}_4$  microspherical structures (Sample 1)

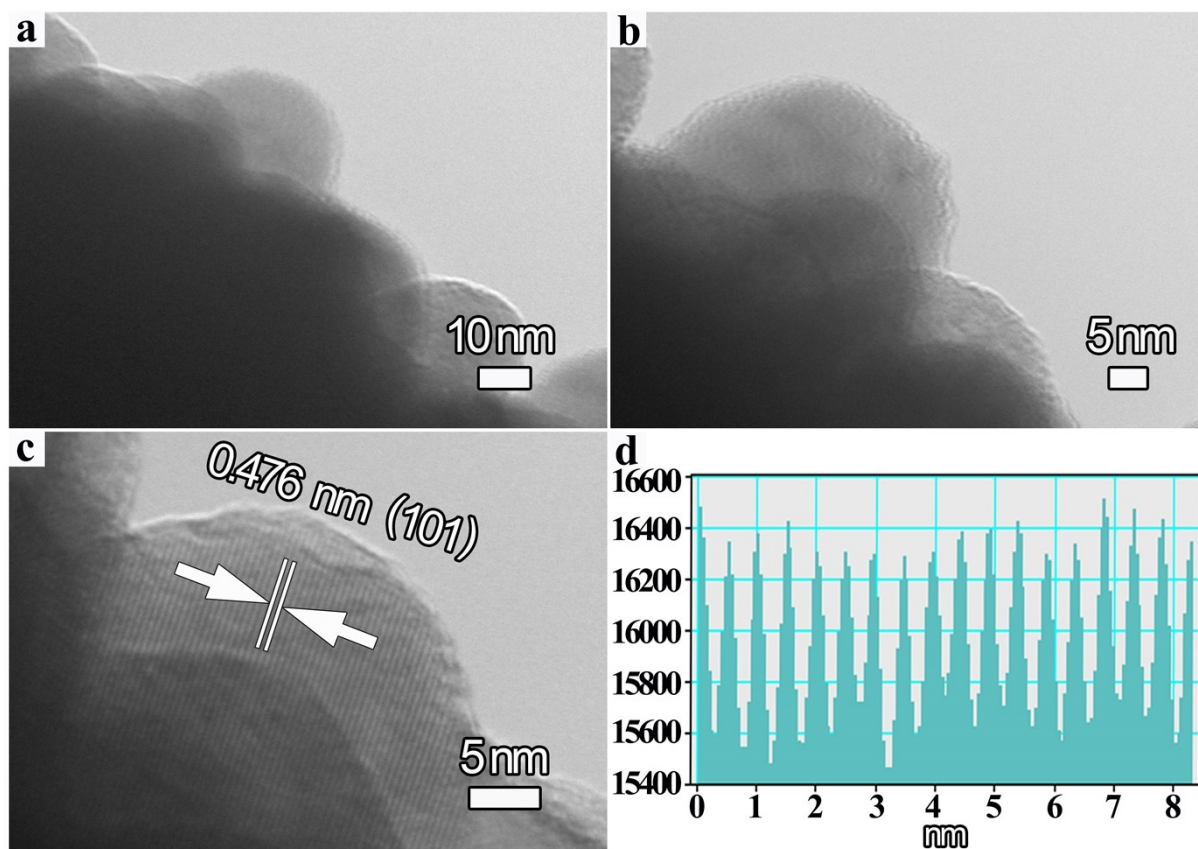

**Fig. S11** (a) and (b) Low magnification TEM images of representative nanospheres of the porous-shell hollow  $\text{CaWO}_4$  microspheres (Sample 1), illustrating crystal nature in different regions. (c) High magnification HRTEM images of a single nanosphere, showing the interplanar distance and plane and consisting with the results of Fig. 1g. (d) The corresponding lattice spacing profile of Fig. S11 c.

(5) The structural information of the as-produced CaWO<sub>4</sub> samples

**Table S2** The corresponding structural data of these CaWO<sub>4</sub>

| Sample | Morphology                       | Size            | Data Sources |
|--------|----------------------------------|-----------------|--------------|
| 1      | Hollow microspheres              | 2.60-5.78 μm    | Fig. S1a     |
|        | Nanospheres                      | 20.94-64.12 nm  | Fig. S1b     |
| 2      | Cauliflower-like microstructures | 3.49-5.33 μm    | Fig. S2a     |
|        | Nanosheets                       | 89.96-269.87 nm | Fig. S4a     |
| 3      | Microspheres                     | 4.15-5.41 μm    | Fig. S2b     |
|        | Ordered nanoparticles            | 31.84-131.01 nm | Fig. S4b     |
| 4      | Porous microspheres              | 4.18-5.90 μm    | Fig. S2c     |
|        | Small nanoparticles              | 23.37-78.63 nm  | Fig. S4c     |
| 5      | Monodisperse microspheres        | 1.87-3.41 μm    | Fig. S2d     |
|        | Nanoparticles                    | 18.03-66.68 nm  | Fig. S4d     |
| 6      | Solid microspheres               | 1.35-3.37 μm    | Fig. S6a     |
|        | Nanoparticles                    | 14.44-64.91 nm  | Fig. S8a     |
| 7      | Solid microspheres               | 1.96-3.31 μm    | Fig. S6b     |
|        | Nanoparticles                    | 13.68-54.08 nm  | Fig. S8b     |
| 8      | Hollow microspheres              | 2.79-5.06 μm    | Fig. S6c     |
|        | Nanoparticles                    | 16.14-58.56 nm  | Fig. S8c     |
| 9      | Hollow microspheres              | 2.12-4.01 μm    | Fig. S6d     |
|        | Nanoparticles                    | 17.97-53.94 nm  | Fig. S8d     |
